# Supplementary material for: Designing a single superabsorbent for separating oil from both layered as well as micron/submicron size emulsified oil/water mixtures by gamma radiation assisted grafting
Source: Royal Society of Chemistry journal article supplement (doi:10.1039/c6ra01162d), 2016-01-01
Supplement: c6ra01162d1.pdf [file c6ra01162d1.pdf]

## Supplementary Information

### **Designing a single superabsorbent for separating oil from both layered as well as micron/submicron size emulsified oil/water mixture by gamma radiation assisted grafting**

Subhendu Ray Chowdhury<sup>1\*</sup>, Atanu Jha<sup>1</sup>, Uttam Manna<sup>2</sup> and K.S.S. Sarma<sup>1</sup>

1. Radiation Technology Development Division, Bhabha Atomic Research Centre, Trombay, Mumbai-400 085, India.
2. Department of Chemistry, Indian Institute of Technology, Guwahati 400086, India

\* To whom all correspondence should be addressed

Tel: +91-22-2788-7347, e-mail: rcsbhen@barc.gov.in; rcsbhendu@gmail.com

Supplementary Schemes and Figures, Figure S1-S4.

Supplementary Schemes and Figures

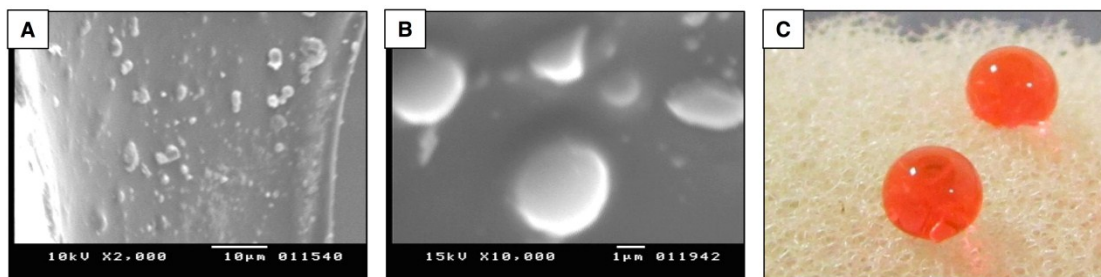

**Figure S1.** A-B) SEM images of DMA modified-PU sponge in higher magnifications for better illustration of the developed submicron/nano features. C) Digital image showing the beading of red color aqueous droplet (10  $\mu$ L) on DMA-grafted sponge that has been manually bended, twisted and squeezed for 100 times.

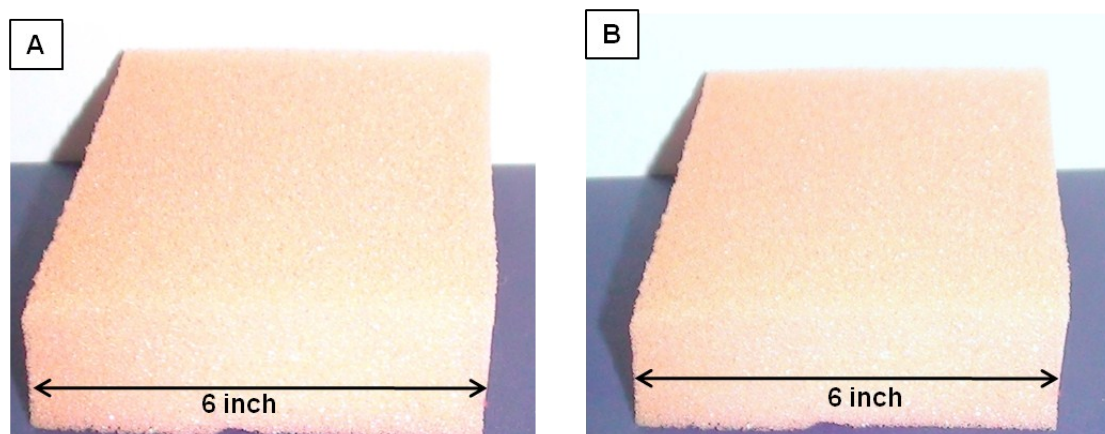

**Figure S2.** A-B) Digital images of pure (A) and DMA grafted (B) PU sponges. Dimension of both the sponges is  $\sim$  6 inches x 6 inches x 2 inches.

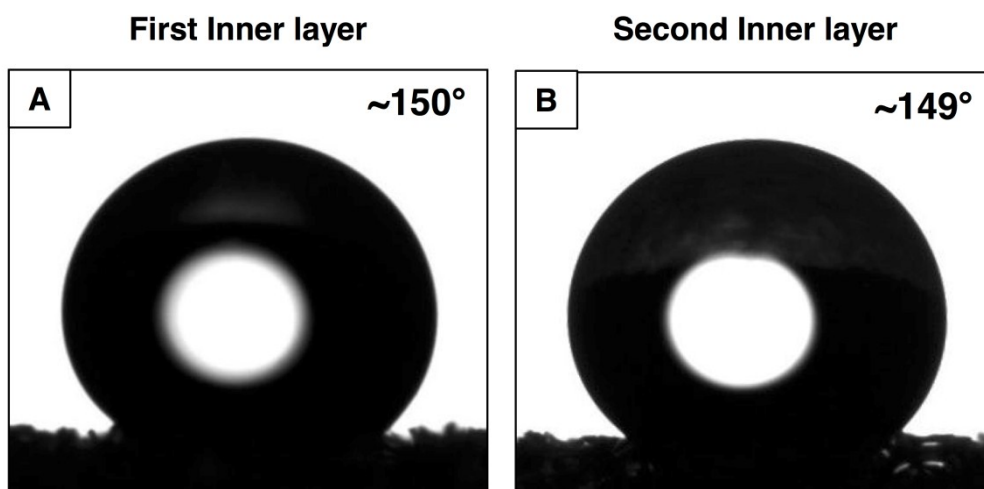

**Figure S3.** A-B) Water contact angle on arbitrarily chosen two inner layers of the modified PU sponges; water contact angle at first and second inner layers are respectively  $\sim 150^\circ$  and  $149^\circ$ .

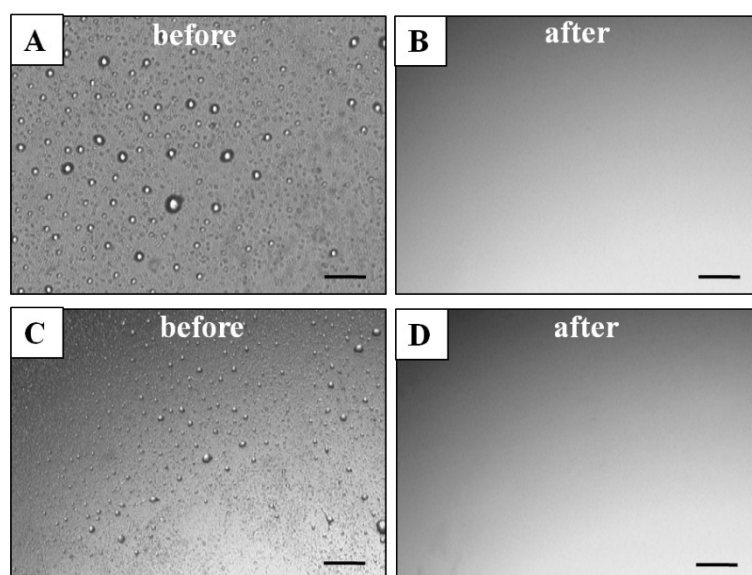

**Figure S4.** Optical microscopy images : emulsion without surfactant A) before and B) after separation, emulsions with surfactant C) before and D) after separation, scale bars = 5  $\mu\text{m}$ .
